# Supplementary material for: ErCas12a CRISPR-MAD7 for Model Generation in Human Cells, Mice, and Rats
Source: PubMed Central journal article supplement — CRISPR J. 2020 Apr 21;3(2):97–108. doi: 10.1089/crispr.2019.0068 (PMC7194332; doi:10.1089/crispr.2019.0068), 2020-04-21
Supplement: Supp_Fig-S1.pdf [file Supp_Fig-S1.pdf]

## Supplementary Data

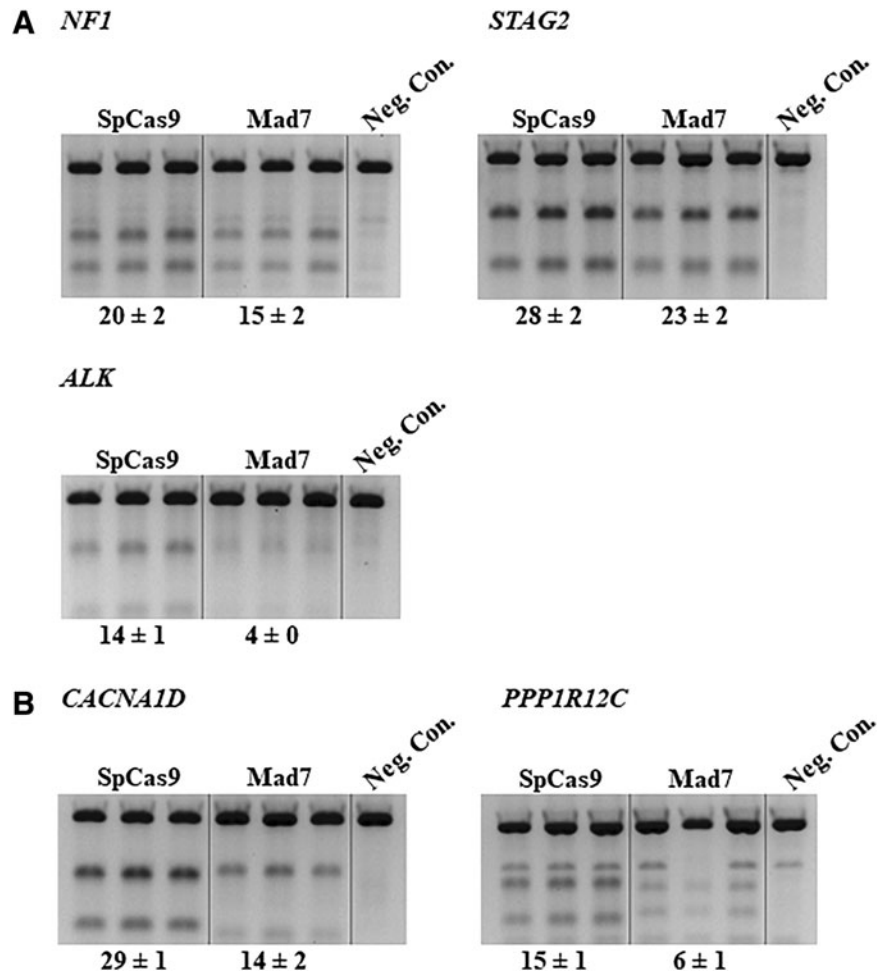

**SUPPLEMENTARY FIG. S1.** DNA mismatch detection assay using T7E1 enzyme for fully overlapping and overlapping seed targets using expressed enzyme and gRNAs in HCT116 cells. Overlapping gRNA target sites *NF1*, *STAG2*, and *ALK* (**A**) or overlapping gRNA seed regions *CACNA1D* and *PPP1R12C* (**B**) for MAD7 and Cas9. PCR amplicons for each gene editing target site were produced from cell lysate generated from each individual transfection. PCR amplicons from untransfected cells for each gRNA target site were used as negative controls (Neg. Con.) in the T7E1 assay. Percent indel formation is shown at the bottom of the gels plus or minus standard deviation.
