# Supplementary material for: ErCas12a CRISPR-MAD7 for Model Generation in Human Cells, Mice, and Rats
Source: PubMed Central journal article supplement — CRISPR J. 2020 Apr 21;3(2):97–108. doi: 10.1089/crispr.2019.0068 (PMC7194332; doi:10.1089/crispr.2019.0068), 2020-04-21
Supplement: Supp_Fig-S2.pdf [file Supp_Fig-S2.pdf]

**A** *PPIB*

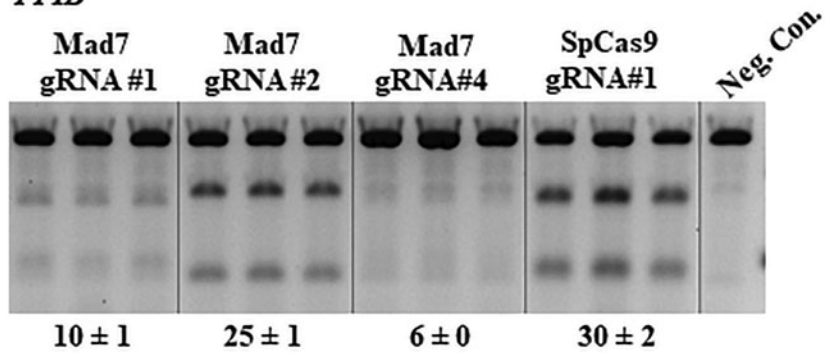

**B** *DNMT3B*

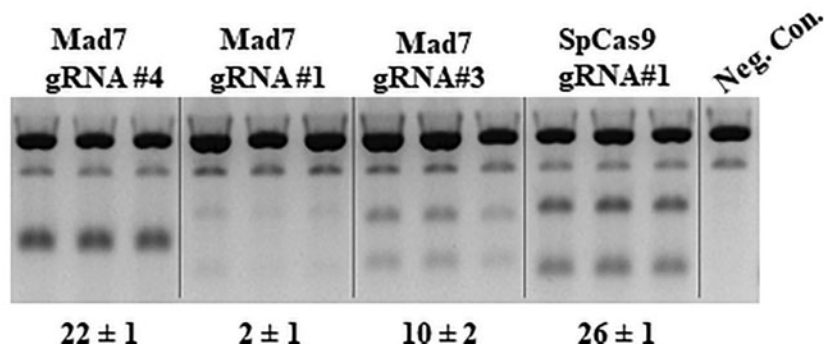

**SUPPLEMENTARY FIG. S2.** DNA mismatch detection assay using T7EI enzyme for non-overlapping, fully overlapping, and overlapping seed MAD7 and Cas9 targets using ribonucleoprotein complexes. Three MAD7 guide RNAs and one Cas9 gRNA were designed for non-overlapping targets *PPIB* (**A**) and *DNMT3B* (**B**) listed above each gel. PCR amplicons for each gene editing target site were produced from cell lysate generated from each individual transfection. PCR amplicons from untransfected cells for each gRNA target site were used as negative controls (Neg. Con.) in the T7EI assay. Percent indel formation is shown at the bottom of the gels plus or minus standard deviation.
