# Supplementary material for: ErCas12a CRISPR-MAD7 for Model Generation in Human Cells, Mice, and Rats
Source: PubMed Central journal article supplement — CRISPR J. 2020 Apr 21;3(2):97–108. doi: 10.1089/crispr.2019.0068 (PMC7194332; doi:10.1089/crispr.2019.0068), 2020-04-21
Supplement: Supp_Fig-S3.pdf [file Supp_Fig-S3.pdf]

### Upstream Junction

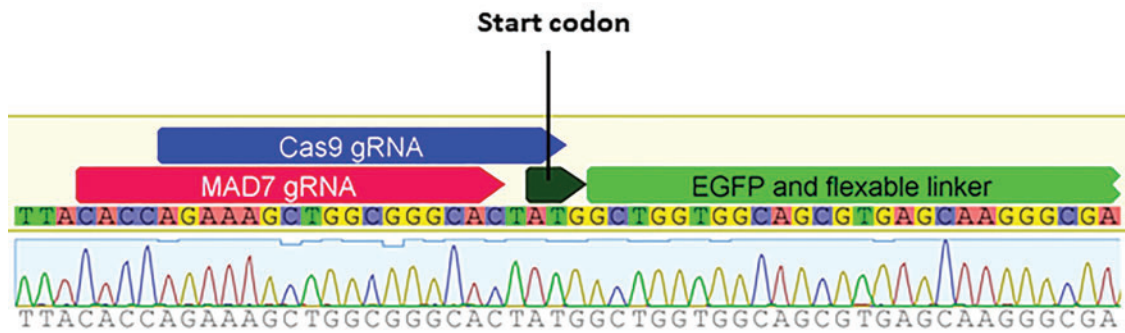

### Downstream Junction

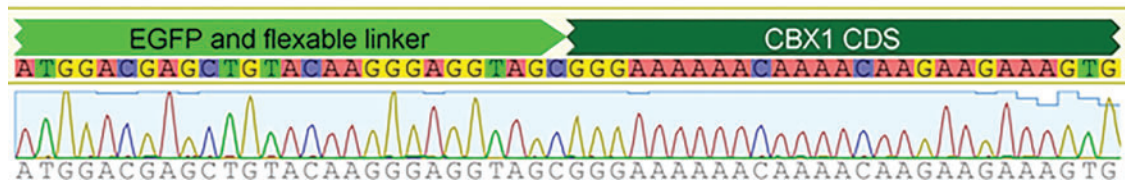

**SUPPLEMENTARY FIG. S3.** PCR amplicons eGFP-positive cells generated from MAD7 gRNA1 were cloned and Sanger sequenced at each eGFP insertion junction.
