# Supplementary material for: ErCas12a CRISPR-MAD7 for Model Generation in Human Cells, Mice, and Rats
Source: PubMed Central journal article supplement — CRISPR J. 2020 Apr 21;3(2):97–108. doi: 10.1089/crispr.2019.0068 (PMC7194332; doi:10.1089/crispr.2019.0068), 2020-04-21
Supplement: Supp_Fig-S6.pdf [file Supp_Fig-S6.pdf]

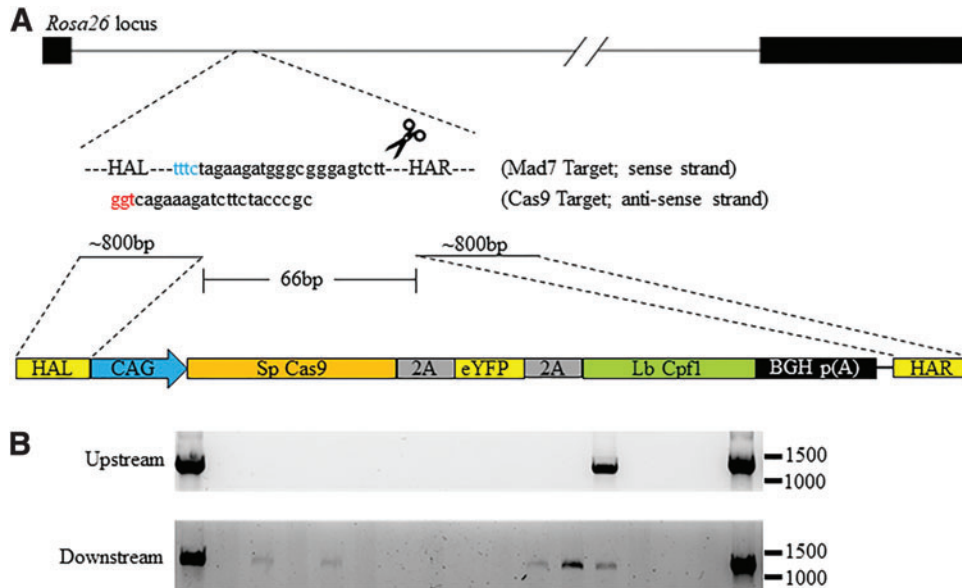

**SUPPLEMENTARY FIG. S6.** Mouse *Rosa26* MAD7 and Cas9 gRNA target with large plasmid donor integrations. **(A)** Schematic representation of the *Rosa26* locus, targeting gRNA and the large targeting donor plasmid. The blue text represents the MAD7 PAM site and the remaining targeting sequence on the sense strand of the *Rosa26* locus, and the sequence below represents the Cas9 target sequence on the anti-sense strand with the PAM site in red. The size of the HA within the plasmid donor and the lines to where they start within the target region. The middle 66 bp listed represents the distance between where the HA start within the *Rosa26* locus. The bottom schematic represents the (R, right; L, left) in yellow, CAG promoter in blue, poly(A) signal in black, and the remaining Cas9-eYFP-Cpf1 gene fusion. **(B)** Upstream (top panel) and downstream (bottom panel) junction PCR amplification products from newborn pups in the Cas9 study. Newborn pups #18–20 not shown on these gels. The numbers on the right in each panel represent DNA size markers and size listed in base pairs.
