# Supplementary material for: ErCas12a CRISPR-MAD7 for Model Generation in Human Cells, Mice, and Rats
Source: PubMed Central journal article supplement — CRISPR J. 2020 Apr 21;3(2):97–108. doi: 10.1089/crispr.2019.0068 (PMC7194332; doi:10.1089/crispr.2019.0068), 2020-04-21
Supplement: Supp_Fig-S8.pdf [file Supp_Fig-S8.pdf]

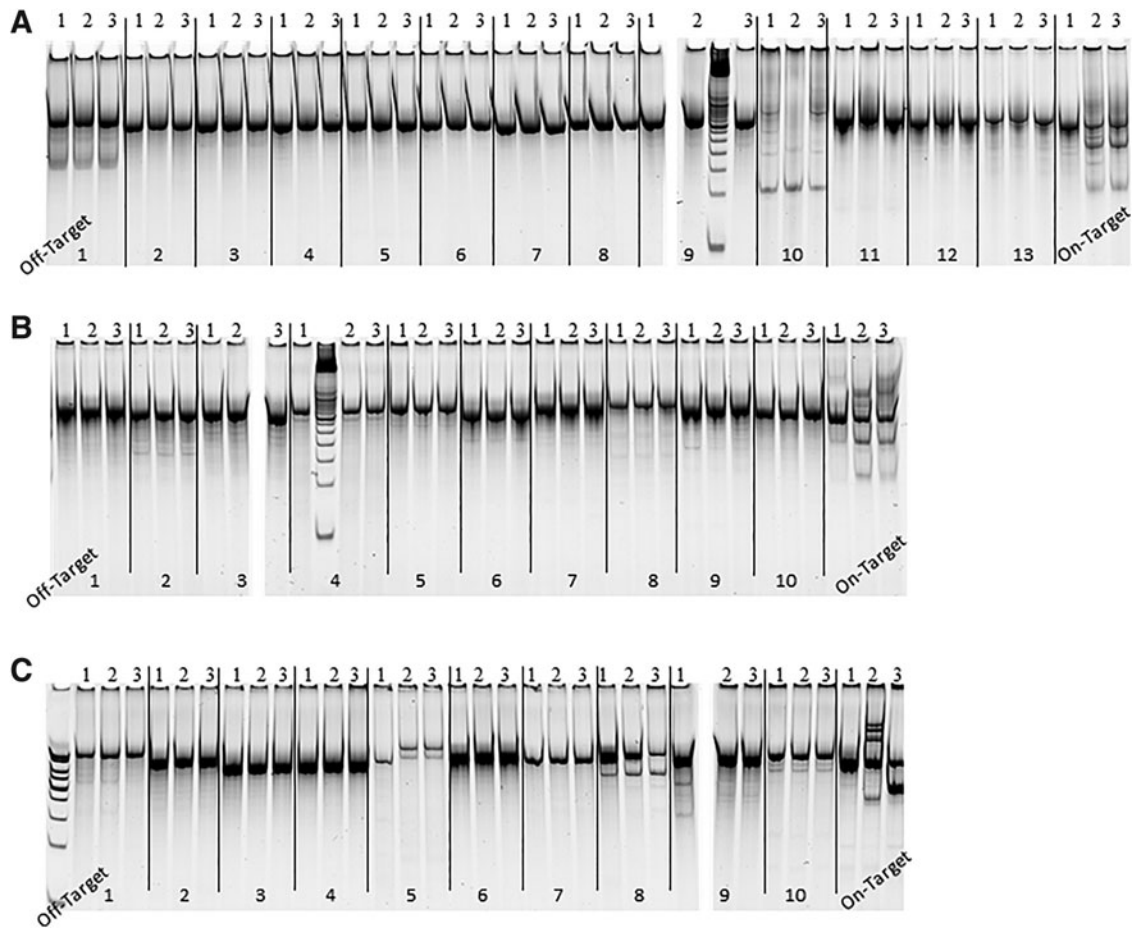

**SUPPLEMENTARY FIG. S8.** DNA mismatch detection assays using Cel-I enzyme for predicted off-targets. **(A)** PCR amplification products from predicted off-targets for the mouse *Rosa26* gRNA #1 used in a DNA mismatch detection assay with the Cel-I enzyme. **(B)** Mouse *Rosa26* gRNA #2 predicted off-targets in the same assay as in A above. **(C)** Rat *Calb2* gRNA #1 predicted off-targets in the same assay as in A above. WT (#1), an individual indel sample (#2) and pool of all the positive indel samples (#3). On-target represents the designed and intended mouse or rat target, respectively. Unlabeled and banded lanes represent DNA markers, unlabeled in this case.
