# Supplementary material for: ErCas12a CRISPR-MAD7 for Model Generation in Human Cells, Mice, and Rats
Source: PubMed Central journal article supplement — CRISPR J. 2020 Apr 21;3(2):97–108. doi: 10.1089/crispr.2019.0068 (PMC7194332; doi:10.1089/crispr.2019.0068), 2020-04-21
Supplement: Supp_Fig-S9.pdf [file Supp_Fig-S9.pdf]

**A**

**Forward PCR Primer**

ATTGTGTGGGGCAGGAGACTCTTTGGGCCAGGCCATGAGCTAAGCCACCCTCACCTCCTTC TCCC TCC TAGGAGATGAAATCCAGCA  
 TAACAACAACCCCGTCC TCTGAGAAAACCCGGTCCGGTACTCGATTTCGGGTGGGAGTGGAGGAAGAGGGAGGATCC TCTAC TTATAGG TCGT

**Guide RNA #1**

GCTCACCACCTACAGGAAGAGCGTCATGTCCTTGGCCGAGGCAGGGAAAC TCTACAGAAAGGACCTGGAGATTGTGCTTTGTCAGTGAGCCC  
 CGAGTGGTGGATGTCC TTCTCGCAGTACAGGAACCGGCTCCGTCCC TTTGAGATGTC TTTC TGGACC TCTAACACGAAACGTCAC TCGGG

**Guide RNA #2**

**Guide RNA #1**

CCCA TGTAAGGGG TGAAGGGACAGGGGCTGCTTCTGCACC TCCCC TAAACCTGCCCCCACTGCCCTGACTCTCTTGAAACTCCTTCCC  
 GGGTACATTTCCAC TTCC TGTCCCAGACGAAAGACGTGGAGGGGATTTGGGACGGGGGTGACGGGACTGAGAGAAC TTTGAGGAAGGG

**-Guide RNA #2**

AGACCTCTCCACCCTGCAACCTGCACACACCAGCCTGTGGGGCAGGAAAGGAGAGATGGAAAGAGGGTGGCTGGTAGCATTCCTTTGAGC  
 TCTGGAGAGGTGGGACGTTGGACGTGTGTTGGTCGGACACCCCGTCTTTCC TCTCTACTTTCTCCACCACCACATCGTAAGGAAACTCG

**Reverse PCR Primer**

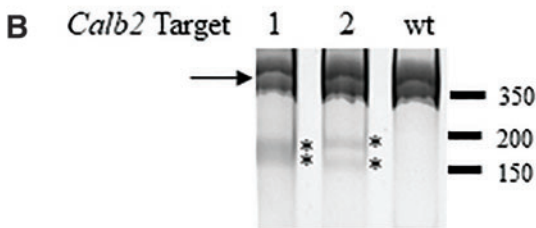

**SUPPLEMENTARY FIG. S9.** MAD7 gRNA target sites and cutting activity for the rat *Calb2* gene. **(A)** The locations of the gRNAs tested for the *Calb2* gene in red and oligonucleotide PCR primers in green. **(B)** DNA mismatch detection assay using *Cel-I* enzyme of the above *Calb2* gRNAs tested in rat C6 cells. The left arrow represents the expected size of the PCR amplification product (364 bp), and the asterisk marks the predicted fragments for gRNA #1 (193 bp, 171 bp) and #2 (197 bp, 167 bp). The numbers on the right represent the location of the DNA size markers in base pairs.
